# Supplementary material for: Role of miR-100-5p and CDC25A in breast carcinoma cells
Source: PeerJ. 2022 Jan 3;10:e12263. doi: 10.7717/peerj.12263 (PMC8734459; doi:10.7717/peerj.12263)
Supplement: Supplemental Information 1 [file peerj-10-12263-s001.xlsx]

## Sheet: Figure 1
Figure 1C
	MCF-10A		T47D		MDA- MB-231		MCF-7		BT-474
	miR-100-5P	U6	miR-100-5P	U6	miR-100-5P	U6	miR-100-5P	U6	miR-100-5P	U6
CT value	29.27	24.21	29.97	24.17	27.88	22.34	26.71	20.67	26.55	20.45
	29.96	24.98	30.38	24.23	28.65	23.02	26.93	20.12	26.04	20.12
	29.47	24.56	31.48	24.87	27.88	22.78	27.82	21.01	25.89	20.48
Average Value	29.5667	24.5833	30.61	24.4233	28.1367	22.7133	27.1533	20.6	26.16	20.35
△CT	4.98333		6.18667		5.42333		6.55333		5.81
△△CT	0		1.20333		0.44		1.57		0.826667
2^-△△CT	1		0.434271		0.737135		0.336808		0.56383
SD Value	0.0519638		0.121958		0.15323		0.114792		0.148786

## Sheet: Figure 2
Figure 2A
	miR-NC		miR-mimic
	miR-100-5P	U6	miR-100-5P	U6
CT Value	27.91	21.34	28.47	22.98
	28.03	21.72	27.33	22.18
	28.82	22.56	28.05	22.65
Figure 2B
Time	0		24		48		72		96
	miR-NC	miR-mimic	miR-NC	miR-mimic	miR-NC	miR-mimic	miR-NC	miR-mimic	miR-NC	miR-mimic
OD Value（490）	0.234	0.232	0.417	0.401	1.055	0.716	1.792	1.076	2.283	1.565
	0.251	0.205	0.443	0.384	0.996	0.778	1.648	1.297	2.086	1.877
	0.206	0.236	0.382	0.364	0.931	0.651	1.941	1.187	2.503	1.704
Figure 2C
	miR-NC	miR-mimic
Number of Cell Clones	141	41
	134	38
	123	46
Figure 2D
	miR-NC	miR-mimic
Number of Cell Invasion	187	83
	200	91
	180	75
Figure 2E
	miR-NC			miR-mimic
0h Scratch Width （mm）	0.854	0.859	0.832	0.825	0.866	0.837
24h Scratch Width（mm）	0.619	0.639	0.572	0.678	0.696	0.687
Figure 2F
	miR-NC			miR-mimic
Q1	0.27	0.47	0.43	0.22	0.39	0.48
Q2	8.36	7.26	9.18	22.4	23.79	21.75
Q3	0.68	0.72	0.8	5.24	4.32	3.49
Q4	90.69	91.55	89.59	72.13	71.5	74.28

## Sheet: Figure 3
Figure 3F
	CDC25A-WT		CDC25A-MUT
	miR-NC	miR-mimic	miR-NC	miR-mimic
Firefly Luciferase	26602.9	12037.3	26302.9	25802.9
	27667	14231.6	28883.4	28197.2
	24838.8	9493.07	24722.4	22472.6
Renilla Luciferase	36292.6	36557.9	35865.7	35903.3
	37781.2	35639.9	37471.8	36054.1
	36463.2	35583.3	37984.1	34874.2
Figure 3G
	miR-NC		miR-mimic
	CDC25A	GAPDH	CDC25A	GAPDH
CT Value	27.65	18.14	28.47	17.78
	28.21	18.62	29.63	18.13
	28.11	18.54	29.35	17.83

## Sheet: Figure 4
Figure 4A
	miR-NC+oe-NC		miR-NC+oe-CDC25A		miR-mimic+oe-CDC25A
	CDC25A	GAPDH	CDC25A	GAPDH	CDC25A	GAPDH
CT Value	27.44	17.54	25.85	17.78	27.75	18.43
	27.32	17.71	26.46	18.13	28.38	18.97
	27.68	17.82	25.92	17.83	28.16	18.57
Figure 4C
Time	0			24			48			72			96
	miR-NC+oe-NC	miR-NC+oe-CDC25A	miR-mimic+oe-CDC25A	miR-NC+oe-NC	miR-NC+oe-CDC25A	miR-mimic+oe-CDC25A	miR-NC+oe-NC	miR-NC+oe-CDC25A	miR-mimic+oe-CDC25A	miR-NC+oe-NC	miR-NC+oe-CDC25A	miR-mimic+oe-CDC25A	miR-NC+oe-NC	miR-NC+oe-CDC25A	miR-mimic+oe-CDC25A
OD Value（490）	0.351	0.313	0.332	0.565	0.654	0.466	0.748	1.211	0.686	0.998	1.596	0.948	1.073	2.061	1.113
	0.324	0.291	0.395	0.463	0.846	0.418	0.831	1.096	0.749	0.901	1.459	0.851	1.194	1.897	1.216
	0.287	0.354	0.365	0.517	0.758	0.511	0.684	1.314	0.618	1.083	1.335	1.025	1.315	1.719	1.008
Figure 4D
	miR-NC+oe-NC	miR-NC+oe-CDC25A	miR-mimic+oe-CDC25A
Number of Cell Clones	109	165	87
	117	177	98
	98	151	78
Figure 4E
	miR-NC+oe-NC			miR-NC+oe-CDC25A			miR-mimic+oe-CDC25A
0h Scratch Width（mm）	0.856	0.833	0.877	0.827	0.846	0.853	0.855	0.862	0.879
24h Scratch Width（mm）	0.676	0.596	0.649	0.485	0.529	0.543	0.655	0.702	0.709
Figure 4F
	miR-NC+oe-NC	miR-NC+oe-CDC25A	miR-mimic+oe-CDC25A
Number of Cell Invasion	105	147	88
	114	161	96
	95	136	105
Figure 4G
	miR-NC+oe-NC			miR-NC+oe-CDC25A			miR-mimic+oe-CDC25A
Q1	0.15	0.15	0.46	0.39	0.45	0.44	0.66	0.48	0.57
Q2	15.24	16.23	15.05	6.66	6.66	8.49	18.21	17.14	16.28
Q3	3.48	2.491	1.52	1.29	1.32	1.37	5.72	6.77	4.88
Q4	81.13	81.13	82.98	91.66	91.57	89.69	75.41	75.61	78.27
